# Supplementary material for: Medical Correctness and User Friendliness of Available Apps for Cardiopulmonary Resuscitation: Systematic Search Combined With Guideline Adherence and Usability Evaluation
Source: PubMed Central journal article supplement (PMC6246966; doi:10.2196/mhealth.9651), 2018-11-06
Supplement: mhealth_v6i11e190_app2.pdf [file mhealth_v6i11e190_app2.pdf]

## Multimedia Appendix 2 - Apps analysed for guideline adherence

|    |                                         |
|----|-----------------------------------------|
| 1  | Alpha First Aid                         |
| 2  | Audi BKK Notfall-Hilfe                  |
| 3  | BHF Pocket CPR                          |
| 4  | Cederroth Notfall App                   |
| 5  | CPR & Choking                           |
| 6  | CPR Assistant                           |
| 7  | Erste Hilfe Grundwissen- Weisses Kreuz  |
| 8  | Erste Hilfe Hand                        |
| 9  | Erste-Hilfe App                         |
| 10 | First Aid for Cyclists                  |
| 11 | First Aid Plus                          |
| 12 | First-Aid (Erste Hilfe weisses Kreuz)   |
| 13 | HALLESCHE Notfall-App                   |
| 14 | HAMBURG SCHOCKT                         |
| 15 | HELP Notfall                            |
| 16 | Kardiopulmonale Reanimation             |
| 17 | Leben Retten                            |
| 18 | Livesaver Mobile                        |
| 19 | MediCode                                |
| 20 | MeinDRK - Die Rotkreuz-App des DRK e.V. |
| 21 | Notfall-App von Gelbe Seiten            |
| 22 | Notfall-Hilfe (audi)                    |
| 23 | PocketCPR                               |
| 24 | Resus Algorithms                        |
| 25 | Richtig helfen                          |
| 26 | Samariterbund Österreich                |
| 27 | Savealife                               |
| 28 | St John NZ CPR                          |
| 29 | St John Wales First Aid                 |
| 30 | St. John Ambulance First Aid            |
| 31 | Standard Erste Hilfe                    |
| 32 | Staying Alive                           |
| 33 | Tiny Hearts First Aid                   |
| 34 | Notfall-Hilfe                           |
